# Supplementary material for: In the line-up: deleted genes associated with DiGeorge/22q11.2 deletion syndrome: are they all suspects?
Source: Springer Nature journal article supplement (doi:10.1186/s11689-019-9267-z), 2019-06-07
Supplement: MOESM1 [file 16781476]

## Human 22q11.2 region gene entries

Genes in Region: 154

(1/2)

|          | start    | stop         | Symbol       | Strand                                                      | Name                                                     | Type    |
|----------|----------|--------------|--------------|-------------------------------------------------------------|----------------------------------------------------------|---------|
| LCR A    | 18178026 | 18205863     | LOC100996415 | -                                                           | uncharacterized LOC100996415                             | ncRNA   |
|          | 18209155 | 18211924     | LOC105372858 | +                                                           | uncharacterized LOC105372858                             | ncRNA   |
|          | 18220562 | 18224162     | LOC101060852 | +                                                           | protein phosphatase 1 regulatory subunit 26-like         | pseudo  |
|          | 18233149 | 18235228     | LOC105379518 | +                                                           | uncharacterized LOC105379518                             | ncRNA   |
|          | 18340163 | 18346065     | GGTLC5P      | +                                                           | gamma-glutamyltransferase light chain 5 pseudogene       | pseudo  |
|          | 18349938 | 18361189     | LOC105372942 | +                                                           | uncharacterized LOC105372942                             | ncRNA   |
|          | 18361830 | 18386526     | LINC01660    | -                                                           | long intergenic non-protein coding RNA 1660              | ncRNA   |
|          | 18401898 | 18404263     | PPP1R26P3    | -                                                           | protein phosphatase 1 regulatory subunit 26 pseudogene 3 | pseudo  |
|          | 18412708 | 18415486     | LOC107987325 | -                                                           | uncharacterized LOC107987325                             | ncRNA   |
|          | 18487127 | 18500594     | FAM230A      | +                                                           | family with sequence similarity 230 member A             | ncRNA   |
|          | 18516338 | 18518161     | GGTLC3       | -                                                           | gamma-glutamyltransferase light chain family member 3    | protein |
|          | 18527054 | 18527702     | LOC100996401 | +                                                           | transmembrane protein 191A                               | protein |
|          | 18527802 | 18531920     | TMEM191B     | +                                                           | transmembrane protein 191B                               | protein |
|          | 18533864 | 18548828     | PI4KAP1      | -                                                           | phosphatidylinositol 4-kinase alpha pseudogene 1         | pseudo  |
|          | 18605865 | 18606102     | RN7SKP131    | -                                                           | RNA, 7SK small nuclear pseudogene 131                    | pseudo  |
|          | 18606124 | 18611919     | RIMBP3       | -                                                           | RIMS binding protein 3                                   | protein |
|          | 18623339 | 18625227     | SUSD2P2      | -                                                           | sushi domain containing 2 pseudogene 2                   | pseudo  |
|          | 18634541 | 18635687     | LOC105372871 | +                                                           | uncharacterized LOC105372871                             | ncRNA   |
|          | 18635987 | 18637497     | CA15P2       | -                                                           | carbonic anhydrase 15 pseudogene 2                       | pseudo  |
|          | 18649828 | 18653812     | PPP1R26P2    | -                                                           | protein phosphatase 1 regulatory subunit 26 pseudogene 2 | pseudo  |
|          | 18715620 | 18719643     | PPP1R26P4    | +                                                           | protein phosphatase 1 regulatory subunit 26 pseudogene 4 | pseudo  |
|          | 18733914 | 18757894     | LINC01662    | +                                                           | long intergenic non-protein coding RNA 1662              | ncRNA   |
|          | 18758535 | 18769783     | LOC105377182 | -                                                           | uncharacterized LOC105377182                             | ncRNA   |
|          | 18773689 | 18791961     | GGT3P        | -                                                           | gamma-glutamyltransferase 3 pseudogene                   | pseudo  |
|          | 18833419 | 18835626     | E2F6P1       | +                                                           | E2F transcription factor 6 pseudogene 1                  | pseudo  |
|          | 18846449 | 18848852     | LOC101929738 | +                                                           | putative POM121-like protein 1                           | pseudo  |
|          | 18850118 | 18861064     | LOC102725072 | +                                                           | Putative uncharacterized protein DKFzp434K191            | pseudo  |
|          | 18852284 | 18858640     | BCRP7        | -                                                           | breakpoint cluster region pseudogene 7                   | pseudo  |
|          | 18865043 | 18894431     | LINC01663    | -                                                           | long intergenic non-protein coding RNA 1663              | ncRNA   |
|          | 18906223 | 18912088     | DGCR6        | +                                                           | DiGeorge syndrome critical region 6                      | protein |
|          | 18912774 | 18936553     | PRODH        | -                                                           | proline dehydrogenase 1                                  | protein |
|          | 18970498 | 19031242     | DGCR5        | +                                                           | DiGeorge syndrome critical region gene 5                 | ncRNA   |
|          | 19017834 | 19020248     | DGCR9        | +                                                           | DiGeorge syndrome critical region gene 9                 | ncRNA   |
|          | 19022624 | 19023550     | DGCR10       | +                                                           | DiGeorge syndrome critical region gene 10                | ncRNA   |
|          | 19036282 | 19122454     | DGCR2        | -                                                           | DiGeorge syndrome critical region gene 2                 | protein |
|          | 19046162 | 19048375     | DGCR11       | -                                                           | DiGeorge syndrome critical region gene 11                | ncRNA   |
|          | 19055841 | 19056187     | LOC100129262 | +                                                           | ribosomal protein L28 pseudogene                         | pseudo  |
|          | 19124874 | 19125887     | TSSK1A       | +                                                           | testis specific serine kinase 1A, pseudogene             | pseudo  |
|          | 19130279 | 19144726     | ESS2         | -                                                           | ess-2 splicing factor homolog (DGCR14)                   | protein |
|          | 19130808 | 19132623     | TSSK2        | +                                                           | testis specific serine kinase 2                          | protein |
|          | 19148991 | 19150283     | GSC2         | -                                                           | gooseoid homeobox 2                                      | protein |
|          | 19171706 | 19172832     | LINC01311    | +                                                           | long intergenic non-protein coding RNA 1311              | ncRNA   |
|          | 19175575 | 19178863     | SLC25A1      | -                                                           | solute carrier family 25, member 1                       | protein |
|          | 19179473 | 19291716     | CLTCL1       | -                                                           | clathrin heavy chain like 1                              | protein |
|          | 19238443 | 19238739     | RPL34P35     | -                                                           | ribosomal protein L34 pseudogene 35                      | pseudo  |
|          | 19253121 | 19253469     | DVL1P1       | -                                                           | dishevelled segment polarity protein 1 pseudogene 1      | pseudo  |
|          | 19257518 | 19258861     | KRT18P62     | +                                                           | keratin 18 pseudogene 62                                 | pseudo  |
|          | 19291796 | 19351456     | LOC105372859 | +                                                           | uncharacterized LOC105372859                             | ncRNA   |
|          | 19330701 | 19431696     | HIRA         | -                                                           | histone cell cycle regulator                             | protein |
|          | 19365765 | 19366044     | RN7SL168P    | +                                                           | RNA, 7SL, cytoplasmic 168, pseudogene                    | pseudo  |
|          | 19431902 | 19436078     | MRPL40       | +                                                           | mitochondrial ribosomal protein L40                      | protein |
|          | 19440886 | 19448232     | C22orf39     | -                                                           | chromosome 22 open reading frame 39                      | protein |
|          | 19447568 | 19454605     | LOC105372860 | +                                                           | uncharacterized LOC105372860                             | ncRNA   |
| 19449941 | 19479215 | UFD1         | -            | ubiquitin recognition factor in ER associated degradation 1 | protein                                                  |         |
| 19479278 | 19520612 | CDC45        | +            | cell division cycle 45                                      | protein                                                  |         |
| 19523024 | 19527545 | CLDN5        | -            | claudin 5                                                   | protein                                                  |         |
| 19566130 | 19566839 | LINC00895    | -            | long intergenic non-protein coding RNA 895                  | ncRNA                                                    |         |
| 19630429 | 19632169 | LOC100129254 | -            | chromosome 3 open reading frame 38 pseudogene               | pseudo                                                   |         |
| 19659258 | 19659814 | LOC100420103 | -            | uncharacterized LOC100420103                                | pseudo                                                   |         |
| 19714464 | 19723322 | 5-Sep        | +            | septin 5                                                    | protein                                                  |         |
| 19717220 | 19724774 | SEPT5-GP1BB  | +            | SEPT5-GP1BB readthrough                                     | protein                                                  |         |
| 19723543 | 19724774 | GP1BB        | +            | glycoprotein Ib platelet beta subunit                       | protein                                                  |         |
| 19727721 | 19738960 | LOC105372861 | +            | uncharacterized LOC105372861                                | ncRNA                                                    |         |
| 19756703 | 19783593 | TBX1         | +            | T-box 1                                                     | protein                                                  |         |
| 19788411 | 19854939 | GNB1L        | -            | G protein subunit beta 1 like                               | protein                                                  |         |
| 19792275 | 19793153 | RPL7AP70     | +            | ribosomal protein L7a pseudogene 70                         | pseudo                                                   |         |
| 19846138 | 19854848 | RTL10        | -            | retrotransposon Gag like 10                                 | pseudo                                                   |         |
| 19875518 | 19941992 | TXNRD2       | -            | thioredoxin reductase 2                                     | protein                                                  |         |
| 19887289 | 19887970 | RPL8P5       | +            | ribosomal protein L8 pseudogene 5                           | pseudo                                                   |         |
| 19941740 | 19969975 | COMT         | +            | catechol-O-methyltransferase isoform                        | protein                                                  |         |
| 19963753 | 19963834 | MIR4761      | +            | microRNA 4761                                               | microRNA                                                 |         |
| 19966491 | 20016802 | ARVCF        | -            | ARVCF, delta catenin family member                          | protein                                                  |         |
| 20017000 | 20067164 | TANGO2       | +            | transport and golgi organization 2 homolog                  | protein                                                  |         |
| 20033139 | 20033220 | MIR185       | +            | microRNA 185                                                | microRNA                                                 |         |
| 20080232 | 20111877 | DGCR8        | +            | DGCR8, microprocessor complex subunit                       | protein                                                  |         |
| 20085746 | 20085833 | MIR3618      | +            | microRNA 3618                                               | microRNA                                                 |         |
| 20086058 | 20086142 | MIR1306      | +            | microRNA 1306                                               | microRNA                                                 |         |
| 20111866 | 20117305 | TRMT2A       | -            | tRNA methyltransferase 2 homolog A                          | protein                                                  |         |

## Human 22q11.2 region gene entries

Continued (2/2)

|          | start    | stop         | Symbol       | Strand                                         | Name                                                     | Type     |
|----------|----------|--------------|--------------|------------------------------------------------|----------------------------------------------------------|----------|
|          | 20114686 | 20114751     | MIR6816      | -                                              | microRNA 6816                                            | microRNA |
|          | 20115938 | 20127357     | RANBP1       | +                                              | RAN binding protein 1                                    | protein  |
|          | 20131841 | 20148007     | ZDHHC8       | +                                              | zinc finger DHHC-type containing 8                       | protein  |
|          | 20148113 | 20151828     | CCDC188      | -                                              | coiled-coil domain containing 188                        | protein  |
|          | 20198730 | 20204918     | LOC284865    | -                                              | uncharacterized LOC284865                                | ncRNA    |
|          | 20206037 | 20213800     | LOC105372862 | -                                              | uncharacterized LOC105372862                             | ncRNA    |
|          | 20206332 | 20208537     | LINC00896    | +                                              | long intergenic non-protein coding RNA 896               | ncRNA    |
|          | 20226945 | 20235971     | LOC105372863 | +                                              | uncharacterized LOC105372863                             | ncRNA    |
|          | 20241415 | 20268293     | RTN4R        | -                                              | reticulin 4 receptor                                     | protein  |
|          | 20244793 | 20253854     | LOC105372864 | +                                              | uncharacterized LOC105372864                             | ncRNA    |
|          | 20249134 | 20249211     | MIR1286      | -                                              | microRNA 1286                                            | microRNA |
| LCR B    | 20297310 | 20313590     | LOC440792    | +                                              | proline dehydrogenase 1 pseudogene                       | pseudo   |
|          | 20314238 | 20320105     | DGCR6L       | -                                              | OTTHUMP00000197880                                       | protein  |
|          | 20340997 | 20352494     | LOC101927859 | +                                              | uncharacterized LOC101927859                             | ncRNA    |
|          | 20363621 | 20390758     | USP41        | -                                              | OTTHUMP00000199828                                       | protein  |
|          | 20394115 | 20408463     | ZNF74        | +                                              | zinc finger protein 74                                   | protein  |
|          | 20416798 | 20416899     | RNU6-225P    | -                                              | RNA, U6 small nuclear 225, pseudogene                    | pseudo   |
|          | 20424584 | 20437859     | SCARF2       | -                                              | hCG_40491                                                | protein  |
|          | 20437970 | 20443203     | LOC107985588 | +                                              | uncharacterized LOC107985588                             | ncRNA    |
|          | 20441519 | 20496249     | KLHL22       | -                                              | kelch like family member 22                              | protein  |
|          | 20449901 | 20453240     | LOC100420177 | +                                              | kelch like family member 12 pseudogene                   | pseudo   |
|          | 20475194 | 20475311     | RNY1P9       | -                                              | RNA, Ro-associated Y1 pseudogene 9                       | pseudo   |
|          | 20481935 | 20482213     | RN7SL812P    | -                                              | RNA, 7SL, cytoplasmic 812, pseudogene                    | pseudo   |
|          | 20482748 | 20484155     | KRT18P5      | -                                              | keratin 18 pseudogene 5                                  | pseudo   |
|          | 20495948 | 20500878     | LOC101928824 | +                                              | uncharacterized LOC101928824                             | ncRNA    |
| 20507542 | 20587632 | MED15        | +            | mediator complex subunit 15                    | protein                                                  |          |
| 20589576 | 20592352 | CCDC74BP1    | -            | coiled-coil domain containing 74B pseudogene 1 | pseudo                                                   |          |
| 20592959 | 20603267 | LOC107985587 | -            | uncharacterized LOC107985587                   | ncRNA                                                    |          |
| LCR C    | 20604895 | 20626185     | SMPD4P1      | -                                              | sphingomyelin phosphodiesterase 4 pseudogene 1           | pseudo   |
|          | 20632590 | 20632826     | IGLL4P       | +                                              | immunoglobulin lambda like polypeptide 4, pseudogene     | pseudo   |
|          | 20639072 | 20650483     | LOC100421121 | -                                              | small G protein signaling modulator 1 pseudogene         | pseudo   |
|          | 20652644 | 20654727     | SLC9A3P2     | +                                              | solute carrier family 9 member 3 pseudogene 2            | pseudo   |
|          | 20667597 | 20671339     | ABHD17AP4    | -                                              | abhydrolase domain containing 17A pseudogene P4          | pseudo   |
|          | 20689555 | 20691721     | POM121L4P    | +                                              | POM121 transmembrane nucleoporin like 4, pseudogene      | pseudo   |
|          | 20695438 | 20698959     | BCRP5        | -                                              | breakpoint cluster region pseudogene 5                   | pseudo   |
|          | 20696566 | 20698250     | LOC107985584 | +                                              | uncharacterized LOC107985584                             | ncRNA    |
|          | 20701114 | 20704603     | TMEM191A     | +                                              | transmembrane protein 191A (pseudogene)                  | pseudo   |
|          | 20707691 | 20858812     | PI4KA        | -                                              | phosphatidylinositol 4-kinase, catalytic, alpha          | protein  |
|          | 20774095 | 20787720     | SERPIND1     | +                                              | serpin family D member 1                                 | protein  |
|          | 20859004 | 20891214     | SNAP29       | +                                              | synaptosome associated protein 29                        | protein  |
|          | 20917398 | 20953749     | CRKL         | +                                              | CRK like proto-oncogene, adaptor protein                 | protein  |
|          | 20957092 | 20964680     | LINC01637    | +                                              | long intergenic non-protein coding RNA 1637              | ncRNA    |
|          | 20965130 | 20981360     | AIFM3        | +                                              | apoptosis inducing factor, mitochondria associated 3     | protein  |
|          | 20982269 | 20999037     | LZTR1        | +                                              | leucine zipper like transcription regulator 1            | protein  |
|          | 20999772 | 21002115     | THAP7        | -                                              | THAP domain containing 7                                 | protein  |
|          | 21001922 | 21010374     | THAP7-AS1    | +                                              | THAP7 antisense RNA 1                                    | ncRNA    |
|          | 21008203 | 21014287     | TUBA3FP      | -                                              | tubulin alpha 3f pseudogene                              | pseudo   |
|          | 21009699 | 21028013     | P2RX6        | +                                              | purinergic receptor P2X 6                                | protein  |
| 21028718 | 21032558 | SLC7A4       | -            | OTTHUMP00000198675                             | protein                                                  |          |
| 21034176 | 21034272 | MIR649       | -            | microRNA 649                                   | microRNA                                                 |          |
| LCR D    | 21042392 | 21044249     | P2RX6P       | -                                              | purinergic receptor P2X 6 pseudogene                     | pseudo   |
|          | 21045960 | 21064168     | LRRRC74B     | +                                              | leucine rich repeat containing 74B                       | protein  |
|          | 21065467 | 21070173     | TUBA3GP      | +                                              | tubulin alpha 3g pseudogene                              | pseudo   |
|          | 21103016 | 21122286     | BCRP2        | +                                              | breakpoint cluster region pseudogene 2                   | pseudo   |
|          | 21112788 | 21128092     | POM121L7P    | +                                              | POM121 transmembrane nucleoporin like 7 pseudogene       | pseudo   |
|          | 21140441 | 21142648     | E2F6P2       | -                                              | E2F transcription factor 6 pseudogene 2                  | pseudo   |
|          | 21166903 | 21192156     | FAM230B      | +                                              | family with sequence similarity 230 member B             | ncRNA    |
|          | 21192790 | 21204020     | LOC105372935 | -                                              | uncharacterized LOC105372935                             | ncRNA    |
|          | 21207972 | 21282982     | GGT2         | -                                              | gamma-glutamyltransferase 2                              | protein  |
|          | 21267884 | 21270091     | E2F6P3       | +                                              | E2F transcription factor 6 pseudogene 3                  | pseudo   |
|          | 21282425 | 21297730     | POM121L8P    | +                                              | POM121 transmembrane nucleoporin like 8, pseudogene      | pseudo   |
|          | 21288229 | 21294589     | BCRP6        | -                                              | breakpoint cluster region pseudogene 6                   | pseudo   |
|          | 21301260 | 21326636     | LOC100996335 | -                                              | uncharacterized LOC100996335                             | ncRNA    |
|          | 21341401 | 21343767     | PPP1R26P5    | +                                              | protein phosphatase 1 regulatory subunit 26 pseudogene 5 | pseudo   |
|          | 21354242 | 21357968     | LINC01651    | +                                              | long intergenic non-protein coding RNA 1651              | ncRNA    |
|          | 21359596 | 21360702     | LOC105377190 | -                                              | uncharacterized LOC105377190                             | ncRNA    |
|          | 21370061 | 21371949     | SUSD2P1      | +                                              | sushi domain containing 2 pseudogene 1                   | pseudo   |
|          | 21383751 | 21389169     | RIMBP3B      | +                                              | RIMS binding protein 3B                                  | protein  |
|          | 21389191 | 21389428     | RN7SKP63     | +                                              | RNA, 7SK small nuclear pseudogene 63                     | pseudo   |
|          | 21417402 | 21451463     | HIC2         | +                                              | HIC ZBTB transcriptional repressor 2                     | protein  |
|          | 21419761 | 21422416     | LOC105377191 | -                                              | uncharacterized LOC105377191                             | ncRNA    |
|          | 21467170 | 21469935     | TMEM191C     | +                                              | transmembrane protein 191C                               | protein  |
|          | 21472998 | 21517491     | PI4KAP2      | -                                              | phosphatidylinositol 4-kinase alpha pseudogene 2         | pseudo   |
|          | 21545407 | 21545644     | RN7SKP221    | -                                              | RNA, 7SK small nuclear pseudogene 221                    | pseudo   |
| 21545666 | 21551461 | RIMBP3C      | -            | RIMS binding protein 3C                        | protein                                                  |          |
| 21549447 | 21624034 | UBE2L3       | +            | ubiquitin conjugating enzyme E2 L3             | protein                                                  |          |
